RESEARCH ARTICLE

# PepAnno: A structure-aware deep learning framework for bioactive peptide prediction, structural visualization, and physicochemical profiling

Enyan Liu<sup>1</sup>, Yueming Hu<sup>1</sup>, Liya Liu<sup>1</sup>, Yifan Chen<sup>1</sup>, Shilong Zhang<sup>1</sup>, Sida Li<sup>1</sup>, Haoyu Chao<sup>1</sup>, Luyao Xie<sup>1</sup>, Yi Shen<sup>1</sup>, Liangwei Wu<sup>1</sup>, Julio Raúl Fernández Massó<sup>2</sup>, Ming Chen<sup>1\*</sup>

**1** Department of Bioinformatics, College of Life Sciences, Zhejiang University, Hangzhou, China, **2** Pharmaceutical Department, Center for Genetic Engineering and Biotechnology, Havana, Cuba

\* [mchen@zju.edu.cn](mailto:mchen@zju.edu.cn)

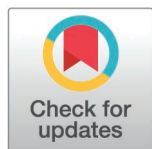

**OPEN ACCESS**

**Citation:** Liu E, Hu Y, Liu L, Chen Y, Zhang S, Li S, et al. (2026) PepAnno: A structure-aware deep learning framework for bioactive peptide prediction, structural visualization, and physicochemical profiling. *PLoS Comput Biol* 22(6): e1014369. <https://doi.org/10.1371/journal.pcbi.1014369>

**Editor:** Shanfeng Zhu, Fudan University, CHINA

**Received:** October 21, 2025

**Accepted:** May 27, 2026

**Published:** June 2, 2026

**Copyright:** © 2026 Liu et al. This is an open access article distributed under the terms of the [Creative Commons Attribution License](https://creativecommons.org/licenses/by/4.0/), which permits unrestricted use, distribution, and reproduction in any medium, provided the original author and source are credited.

**Data availability statement:** PepAnno is freely accessible at <https://bis.zju.edu.cn/pepanno/>. The dataset of PepAnno can be downloaded from <https://bis.zju.edu.cn/pepanno/data/>.

**Funding:** This work was supported by the National Key Research and Development Program of China [2023YFE0112300 to MC];

## Abstract

Peptides are gaining prominence as therapeutic candidates due to their diverse physiological functions and structural simplicity. Although multiple computational tools exist for bioactive peptide prediction, many suffer from limitations such as non-intuitive interfaces, sequence-only representations, insufficient structural awareness, restricted interpretability, or fragmented analysis workflows, leading to reduced research efficiency and higher costs. To address these challenges, we present PepAnno (<https://bis.zju.edu.cn/pepanno/>), a comprehensive and user-friendly web server for multi-functional peptide annotation. PepAnno is powered by a novel structure-aware, multi-view geometric deep learning framework that integrates pre-trained sequence embeddings with predicted 3D structural graphs through a dual-stream architecture combining a Transformer and a GATv2 network. A cross-modal attention mechanism is employed to effectively fuse semantic and geometric representations, enabling accurate multi-task prediction across 7 key bioactivities, including antimicrobial and anticancer properties. Comprehensive evaluation on seven curated bioactivity datasets demonstrates that PepAnno achieves robust and competitive predictive performance across tasks, consistently outperforming or matching existing methods in terms of discrimination and stability. Beyond functional prediction, PepAnno provides automated calculation of physicochemical properties, structure visualization, and access to an integrated repository of peptide-related databases and tools. By enabling one-click peptide annotation, PepAnno offers an efficient and interpretable solution for large-scale peptide analysis and facilitates downstream experimental design and peptide-based drug discovery.

National Natural Sciences Foundation of China [32270709, 32261133526, 32570787 to MC]; 151 Talent Project, and Science and Technology Innovation Leader of Zhejiang Province [2022R52035 to MC]; Jiangsu Collaborative Innovation Center for Modern Crop Production and Collaborative Innovation Center for Modern Crop Production co-sponsored by province and ministry to MC. The funders had no role in study design, data collection and analysis, decision to publish, or preparation of the manuscript.

**Competing interests:** The authors have declared that no competing interests exist.

## Author summary

PepAnno is an integrated web server developed to advance the study of bioactive peptides—small yet versatile molecules with significant therapeutic and diagnostic potential. Although several computational tools have been developed to identify peptide activities, researchers often need to rely on multiple independent platforms to obtain functional, structural, and physicochemical information, resulting in fragmented and inefficient workflows. More importantly, most existing predictors operate as black boxes, offering limited mechanistic insight into how specific spatial motifs govern biological functions. To bridge this gap, we developed PepAnno, a comprehensive and user-friendly web server. PepAnno is powered by a novel structure-aware, multi-view deep learning framework that synergizes sequence semantics with 3D structural geometry. By leveraging a strict hierarchical transfer learning strategy, it achieves highly accurate predictions across seven major functional categories, effectively overcoming the challenge of data scarcity. Crucially, PepAnno breaks the barrier by providing native biological interpretability. It dynamically maps the model's cross-attention weights onto 3D structures, empowering researchers to visually pinpoint key functional residues. Along with automated physicochemical profiling and a curated knowledge base of peptide resources, PepAnno unifies robust prediction, structural interpretability, and centralized data access. This integrated design significantly streamlines research workflows, helping scientists formulate mechanistically meaningful hypotheses and accelerating peptide-based drug discovery.

## Introduction

Bioactive peptides (BPs) are short-chain molecules formed by amino acids linked via peptide bonds, widely distributed in various biological organisms, including animals and plants [1]. BPs exhibit a diverse array of biological activities, encompassing crucial functions such as antimicrobial, anticancer, anti-inflammatory, and antiviral effects [2–5]. For instance, antimicrobial peptides (AMPs), a class of short peptides with broad-spectrum antimicrobial, antiviral, and antifungal activities, are ubiquitously found in the epithelial barriers and systemic immune defense systems of multicellular eukaryotes [3,6]. Compared to conventional single-target antibiotics, AMPs possess a relatively lower risk of inducing microbial resistance, attributable to their rapid and efficient membrane-acting mechanisms and multi-target inhibitory properties [6]. Beyond AMPs, other BPs also hold substantial clinical promise, driving extensive research into their classification and functional characterization [7,8]. Over the past few decades, more than 7,000 naturally occurring peptides with extensive biological activities have been identified within the human body. These peptides typically exert their biological effects by binding to cell surface receptors (particularly G protein-coupled receptors), thereby activating intracellular signal transduction pathways [9]. Their short sequence lengths (typically <50 residues) further facilitate

chemical synthesis, making BPs ideal candidates for novel therapeutics and diagnostics [10,11]. The rapid advancements in molecular biology and bioinformatics have further underscored the therapeutic potential of peptides, establishing BPs as a key research focus in contemporary life sciences and medicine [12]. Nevertheless, owing to their high sequence diversity, the accurate identification and functional prediction of BPs remain significant challenges, particularly in high-throughput screening processes where associated costs can also be considerable.

The rapid accumulation of experimental data in peptide omics and related fields has stimulated the development of machine learning approaches for bioactive peptide (BP) function prediction, resulting in a growing number of computational tools [13–15]. In particular, the identification of multifunctional BPs is inherently a multi-label classification problem, motivating the adoption of multi-label learning strategies [16–18]. Despite these advances, the application of multi-label and multi-functional models to BP prediction remains constrained. Existing approaches often exhibit reduced predictive accuracy as the number of functional categories increases, largely due to their reliance on sequence-only representations and extensive zero-padding of variable-length peptides. Such strategies may obscure biologically meaningful signals and limit the modeling of function-specific structural determinants. Moreover, most current multi-functional platforms provide limited interpretability and lack structure-aware or residue-level insights that are critical for understanding peptide function mechanisms. From a practical perspective, both single-function and multi-functional BP prediction tools continue to face challenges in usability and sustainability. Our survey of 135 BP prediction tools published within the past five years revealed that many suffer from fragmented workflows, incomplete documentation, unavailable or non-callable source code, and discontinued online services. Even when local deployment is feasible, users often need to combine multiple independent tools to obtain complementary functional and structural information, making comprehensive peptide analysis inefficient and error-prone.

To overcome the aforementioned limitations, we developed PepAnno, a structure-aware, multi-functional peptide annotation platform that unifies sequence analysis, structural modeling, and functional prediction within a single framework. PepAnno enables “one-click” automated analysis, ranging from physicochemical property calculation and structure prediction to the annotation of seven major bioactive peptide functions, including antimicrobial, anticancer, anti-inflammatory, antiviral, antihypertensive, anti-angiogenic, and cell-penetrating activities. By integrating structure-aware learning and cross-modal feature fusion, PepAnno provides accurate and interpretable predictions while substantially simplifying peptide analysis workflows. In addition, PepAnno incorporates a curated repository of manually validated peptide-related databases and computational resources, offering a centralized and freely accessible platform to support systematic peptide research and downstream applications.

## Results

### Functionality of PepAnno

PepAnno serves as integrated web-based platform for peptide sequence annotation and functional analysis (Fig 1). Its primary functionality is the AI-driven evaluation of peptide bioactivities. Furthermore, the platform facilitates the calculation of fundamental physicochemical properties of peptides and enables the prediction and visualization of secondary and tertiary structures.

Users initiate predictions via the ‘Predict’ interface or the ‘Other Tools’ interface (see Fig A in S1 Appendix). In the prediction interface, Users can select from 54 amino acid scales for profile computation (e.g., Hydropathicity Scale, Transmembrane tendency scale by default) and adjust the compute window size. For optional model-based predictions, users can select from seven types of peptide bioactive functions and choose specific predictive models.

PepAnno provides comprehensive visualization of prediction results organized into four modules (see Fig A in S1 Appendix). ‘**General Information**’ provides a summary table of basic peptide attributes, accompanied by visualizations such as amino acid composition bar charts and residue percentage line plots. ‘**Physical-chemical Information**’ presents key physicochemical properties (e.g., molecular weight, aromaticity, instability index and isoelectric point) in a structured



## Ablation studies

To explicitly isolate the incremental value of our training strategies and architectural components, we conducted a targeted ablation study on the representative AVP task. All variants were evaluated under a rigorous 5-fold cross-validation protocol, reporting the mean and standard deviation to ensure stability comparisons (Table 1).

Comparing the full model with Variant B (Direct Training), we observed a significant performance degradation in Variant B. This validates that pre-training on the large-scale AMP dataset is indispensable for establishing a robust feature backbone and preventing overfitting on smaller datasets. Furthermore, evaluating Variant C (Pretrain + No Reset) highlights the necessity of the Head Reset strategy. Although keeping the pre-trained classification head (Variant C) yielded a comparable AUC, resetting the head (Full Model) resulted in a superior and more stable MCC (0.7335 vs. 0.7303) and Accuracy (0.8663 vs. 0.8650). This confirms that resetting task-specific decision boundaries effectively mitigates negative transfer between orthogonal peptide functions. We also evaluated a sequence-only model (Variant A). Driven by the massive representational capacity of the pre-trained ProtT5 language model, this simplified variant achieved slightly higher scores on certain metrics. However, it exhibited a lower true positive rate (Sensitivity) compared to our Full Model (0.8716 vs. 0.8773). Furthermore, sequence-only predictions lack the ability to anchor its predictions in spatial physical geometry.

## Performance

**Holistic performance evaluation.** A holistic evaluation of the model's classification capability is presented in Fig 3A, complemented by the comprehensive performance summary in Tables B in S1 Appendix. As illustrated in Fig 3A, the model demonstrates a well-balanced performance profile across multiple evaluation metrics, including AUC, Accuracy, and F1-score. Notably, the model achieves exceptional discriminative power on AVP and CPP tasks, with AUC values exceeding 0.90, highlighting its strong capability to distinguish antiviral and cell-penetrating peptides from non-functional sequences. For more challenging categories such as AAP and AIP, where limited sample availability and higher functional heterogeneity typically impede deep learning performance, the model maintains competitive accuracy and F1-score values without excessive degradation.

To rigorously verify that our framework generalizes robustly and is not biased toward specific sequence lengths, we conducted a length-stratified evaluation on the independent test set (using the AVP task as a representative case). The test sequences were partitioned into three subgroups based on length(L): Short ( $L \leq 10$ ), Medium ( $11 \leq L \leq 25$ ), and Long ( $L > 25$ ). As illustrated in Fig 2, PepAnno maintained highly consistent predictive performance (AUC and ACC) across all length strata.

Detailed training dynamics and convergence behavior across folds are provided in S1 Appendix (Fig B, C and Table A), further supporting the robustness and stability of the proposed framework. Detailed definitions of the model evaluation metrics are given in S1 Appendix.

**Comparison with state-of-the-art methods.** To comprehensively evaluate PepAnno, we conducted two complementary benchmarking analyses: (1) comparisons with task-specific predictors within each of the seven functional categories, and (2) comparisons with existing multi-functional peptide prediction platforms. For category-wise evaluations,

**Table 1. Ablation Study on the AVP Task (5-Fold Cross-Validation).**

| Model Variant | Architecture     | Training Strategy     | ACC             | SN              | SP              | MCC             | AUC             |
|---------------|------------------|-----------------------|-----------------|-----------------|-----------------|-----------------|-----------------|
| Full Model    | Seq + Struct GNN | Pretrain + Head Reset | 0.8663 ± 0.0096 | 0.8773 ± 0.0161 | 0.8555 ± 0.0284 | 0.7335 ± 0.0186 | 0.9249 ± 0.0095 |
| Variant A     | Sequence Only    | Direct Training       | 0.8742 ± 0.0075 | 0.8716 ± 0.0333 | 0.8767 ± 0.0223 | 0.7494 ± 0.0145 | 0.9430 ± 0.0053 |
| Variant B     | Seq + Struct GNN | Direct Training       | 0.8581 ± 0.0028 | 0.8445 ± 0.0112 | 0.8715 ± 0.0117 | 0.7165 ± 0.0055 | 0.9202 ± 0.0080 |
| Variant C     | Seq + Struct GNN | Pretrain + No Reset   | 0.8650 ± 0.0082 | 0.8651 ± 0.0183 | 0.8650 ± 0.0096 | 0.7303 ± 0.0165 | 0.9274 ± 0.0068 |

<https://doi.org/10.1371/journal.pcbi.1014369.t001>

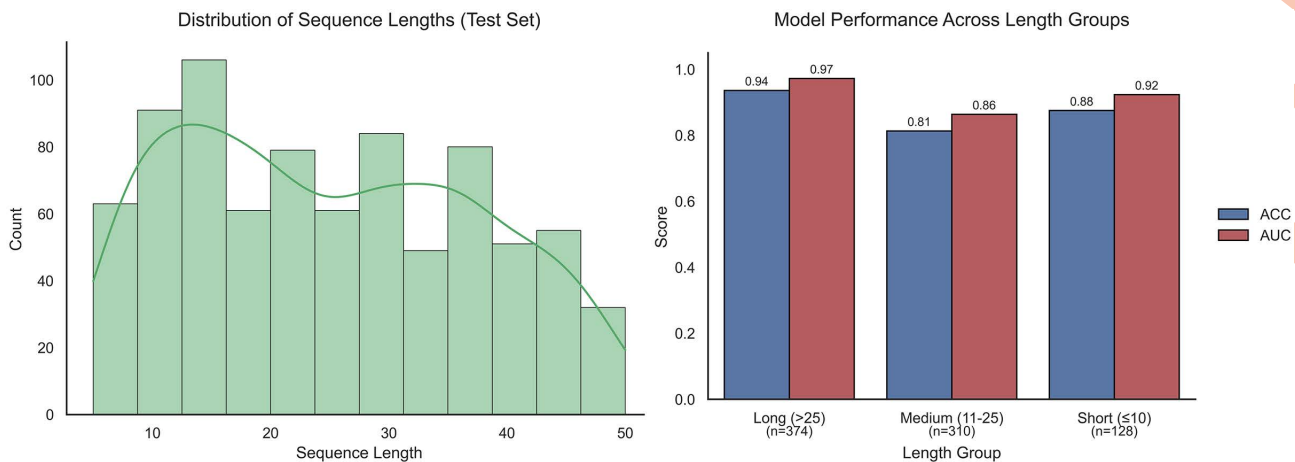

**Fig 2. Length-stratified evaluation on the AVP independent test set.**

<https://doi.org/10.1371/journal.pcbi.1014369.g002>

PepAnno was benchmarked against representative state-of-the-art tools specifically designed for each activity, enabling a fair assessment under matched task definitions and evaluation metrics. Across these comparisons, PepAnno consistently achieved competitive or superior performance, while operating under a unified multi-task framework rather than task-dependent feature engineering or model selection.

For multi-functional platform benchmarking, direct one-to-one comparison across all seven functional categories was not feasible, as no existing integrative predictor supports the identical functional spectrum covered by PepAnno. Therefore, we adopted an intersection-based evaluation strategy, restricting comparisons to functional categories shared between PepAnno and each multi-functional baseline. Specifically, PepAnno was compared with AutoPeptideML [13], iAMPCN [14], and UniDL4BioPep [15] on four overlapping functions, ensuring methodological consistency and avoiding extrapolation beyond the scope of each platform (Fig 3B, Tables C in S1 Appendix). Under this conservative setting, PepAnno demonstrated strong and balanced performance across shared tasks, matching or exceeding the predictive accuracy of existing multi-functional approaches while providing a broader functional coverage and residue-level interpretability not available in previous platforms.

Across seven category-specific benchmarks, PepAnno demonstrated consistently competitive performance relative to state-of-the-art task-specific predictors [14, 19–60]. It achieved top or near-top performance in antimicrobial (AMP), antiviral (AVP), antibiofilm-associated (AAP), and cell-penetrating peptide (CPP) prediction. For anticancer peptides (ACP), PepAnno ranked within the top tier, closely approaching leading specialized models. In more challenging categories with greater label heterogeneity, including anti-inflammatory (AIP), and antihypertensive peptides (AHP), PepAnno maintained competitive mid-range performance. Overall, these results indicate that a unified multi-task framework can effectively match specialized predictors across diverse peptide functions. Detailed results are provided in Tables D–J in S1 Appendix.

### Case study: Mechanistically interpretable multi-functional annotation of Human Neutrophil Peptide-1 (HNP-1)

Neutrophils are typically the first immune cells recruited to an infection site, where they release effector molecules such as Human Neutrophil Peptides (HNPs) [61]. Although HNPs exhibit direct and potent antimicrobial activities [62], these also modulate immune responses, including chemotaxis, phagocytosis, and cytokine induction. In addition to their antimicrobial functions, HNPs possess anticancer activities, including membranolytic and antiangiogenic effects [63].

We input the sequences of HNP-1 into PepAnno to perform a comprehensive analysis. The functional prediction module successfully validated the known antimicrobial and anticancer functions and, importantly, suggested novel potential

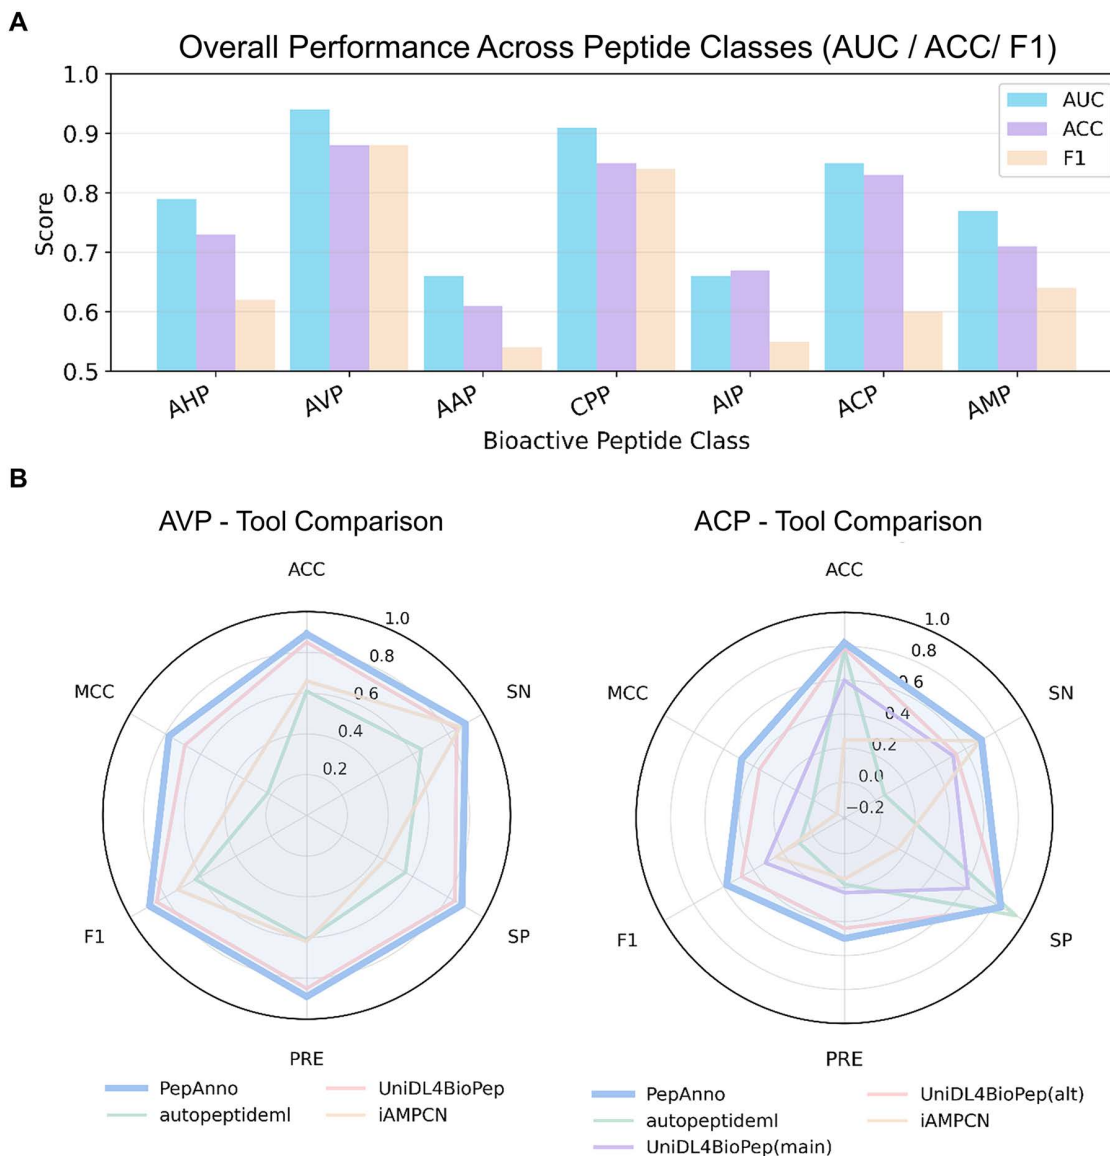

**Fig 3. (A) Overall performance (AUC, ACC, and F1-score) of the proposed model across seven peptide categories on the independent test dataset. (B) Radar chart comparisons of PepAnno and existing tools on the AVP and ACP categories. PepAnno is highlighted for clarity.**

<https://doi.org/10.1371/journal.pcbi.1014369.g003>

activities, including anti-inflammatory, antivirus, anti-angiogenic and cell-penetrating activities, while assigning a negligible probability to antihypertensive activity (Fig 4A). The predicted antimicrobial and cell-penetrating activities are consistent with their primary mechanism, which involves electrostatic interactions between the cationic properties and anionic bacterial membrane, leading to membrane disruption. Similarly, the predicted anticancer function is supported by multiple lines of evidence, including the induction of membrane pores formation at high concentrations, inhibition of DNA synthesis, and interference with tumor angiogenesis. Crucially, the prediction of anti-inflammatory potential is particularly compelling, given that HNPs are known to modulate immune responses by regulating the release of inflammatory factors such as IL-8 [61,63].

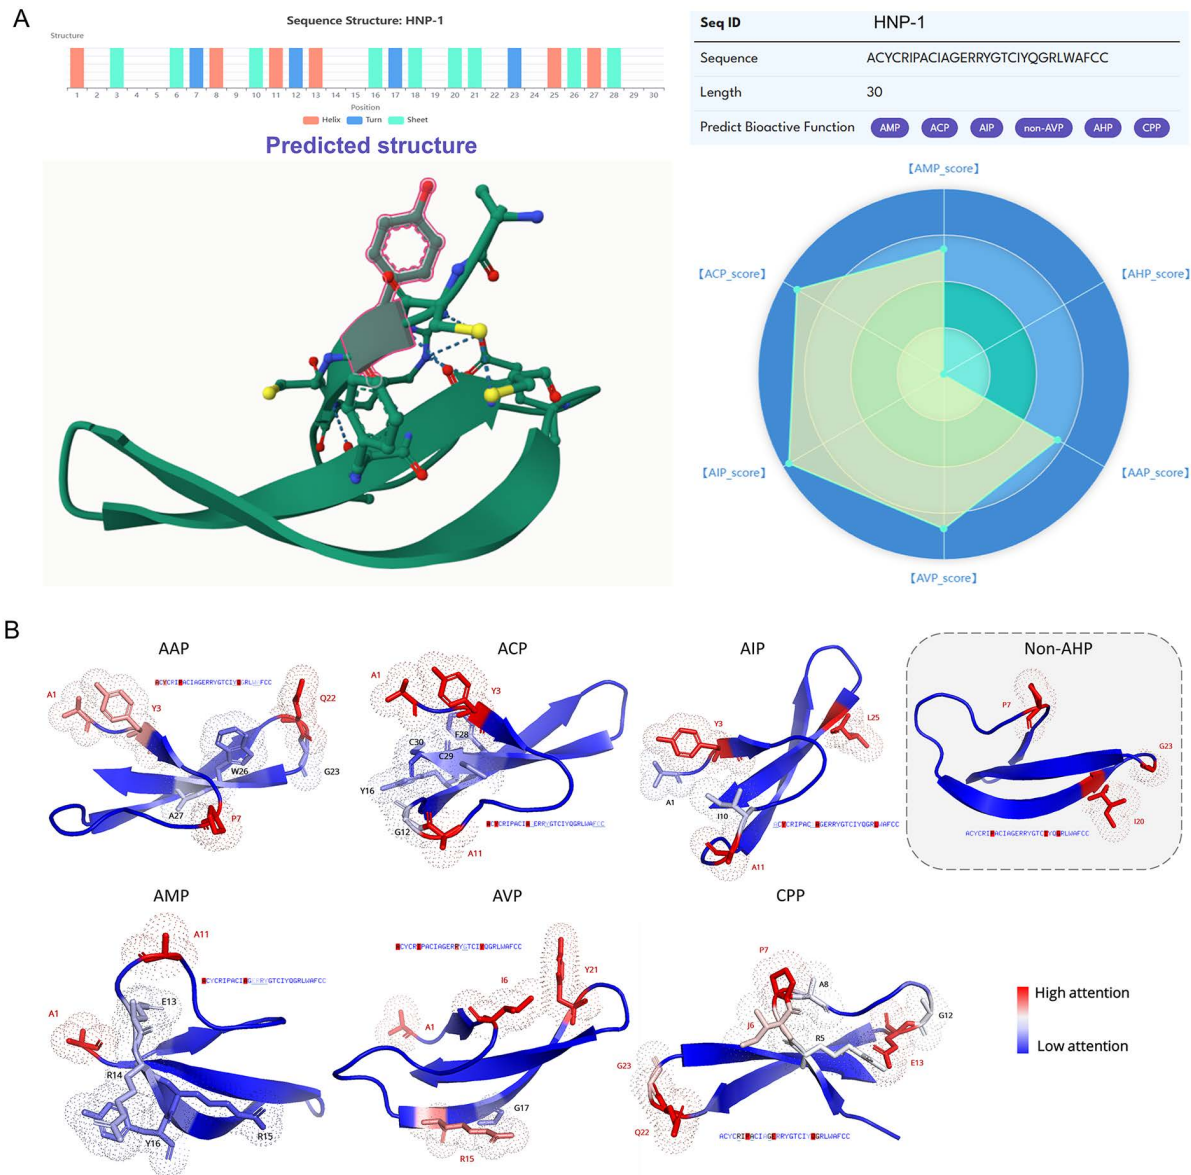

**Fig 4. (A) Comprehensive multi-functional prediction of HNP-1 by PepAnno. (B) Residue-level attention patterns of HNP-1 across seven functional prediction heads.**

<https://doi.org/10.1371/journal.pcbi.1014369.g004>

Beyond function-level predictions, PepAnno enables residue-level interpretability by projecting attention weights from each functional prediction head onto the three-dimensional structure of HNP-1. Attention weights reflect the relative contribution of residues to model inference. As shown in Fig 4B, distinct functional heads emphasize partially overlapping yet clearly differentiated residue sets, revealing how the same peptide sequence can encode multiple biological activities through structurally localized determinants [64]. For example, residues A1 and A11 consistently receive high attention across several functions, reflecting their critical role in defining  $\alpha$ -defensin identity and maintaining the correct  $\beta$ -sheet fold stabilized by conserved disulfide bonds. In contrast, antimicrobial and antiviral predictions preferentially highlight clusters of positively charged residues (e.g., R14 and R15), consistent with electrostatic interactions with anionic microbial

membranes and viral envelopes. Importantly, functions with more specific mechanistic requirements display correspondingly distinct attention patterns. The antibiofilm-associated and anticancer predictions strongly emphasize hydrophobic aromatic residues such as W26, Y16, and F28, which have been experimentally shown to govern membrane insertion, oligomerization, and target binding. Similarly, the anti-inflammatory prediction selectively highlights residues implicated in protein–protein interactions and immunomodulatory signaling rather than broad membrane disruption. Notably, the antiviral prediction uniquely assigns elevated attention to G17, a residue known to participate in  $\beta$ -bulge formation and defensin dimerization, processes previously linked to viral neutralization mechanisms.

To further assess biological plausibility, we systematically mapped residues with attention to experimentally established molecular mechanisms reported in the literature (Table 2) [64]. This analysis demonstrates a strong correspondence between PepAnno’s learned representations and known structure–function relationships of HNP-1, including disulfide bond integrity, charge-mediated surface recognition, hydrophobic execution sites, and oligomerization-dependent activity. Residues receiving low attention predominantly localize to conserved  $\beta$ -sheet scaffolding regions, suggesting that the model appropriately distinguishes structural necessity from functional specificity.

Collectively, this case study illustrates that PepAnno not only recapitulates the known multifunctional repertoire of HNP-1 but also provides mechanistically interpretable insights at residue resolution. By aligning deep learning–derived attention with experimentally validated molecular mechanisms, PepAnno enables hypothesis-driven exploration of peptide function and offers a transparent framework for dissecting the functional complexity of bioactive peptides.

## Materials and methods

### Dataset construction

All datasets used in this study were collected from previously published studies to ensure fair and unbiased performance evaluation and comparison. In total, seven bioactivity-oriented BP datasets were curated, covering antimicrobial [65,66], anticancer [57], anti-inflammatory [58], antiviral [67], angiotensin-converting enzyme (ACE) inhibitory (anti-hypertensive) [68], anti-angiogenic [69], and cell-penetrating activities [70]. Detailed statistics and characteristics of each dataset are summarized in Table 3. Furthermore, to ensure the consistency of the feature space, we analyzed the sequence length distribution of the curated datasets. As visualized in Fig D in S1 Appendix, the length distributions of the training and independent test sets are highly consistent.

For AMP dataset, we first merged the collected data and removed intra-dataset redundancies using CD-HIT [71] with a sequence identity threshold of 0.9. Because the independent test set reported by Xu et al. [66] was adopted for performance evaluation, we ensured strict separation by eliminating any AMP training sequences that exhibited  $\geq 90\%$  sequence identity to test set. Crucially, to prevent data leakage during the subsequent transfer learning process, we conducted explicit cross-task overlap checks. We utilized CD-HIT to remove any sequences from the AMP pre-training set that shared  $\geq 90\%$  identity with the independent test sets of the remaining six functional categories. This rigorous homology filtering yielded a final set of 8,387 positive AMP training sequences. Finally, to construct a balanced dataset, the negative samples were randomly down-sampled to 8,387 sequences, strictly matching the number of positive AMP samples used for model pre-training.

### PepAnno workflow

The PepAnno platform follows an end-to-end workflow encompassing data input, feature calculation, structural analysis, functional prediction, and result visualization (Fig 5). Users initiate the process by submitting peptide sequences and prediction parameters through the intuitive front-end interface. Upon submission, an automated quality control pipeline verifies compliance with FASTA format standards, with only validated data progressing to subsequent analysis.

In the back-end pipeline, validated peptide sequences are first converted into SeqIO-compatible formats for standardized processing. PepAnno then performs systematic physicochemical feature calculation using established bioinformatics

**Table 2. Residue-level mechanistic interpretation of PepAnno predictions for HNP-1.**

| Residue                                                          | Attention   | Functional type         | Established molecular mechanism                                                                                | Supporting evidence from literature                                                                              |
|------------------------------------------------------------------|-------------|-------------------------|----------------------------------------------------------------------------------------------------------------|------------------------------------------------------------------------------------------------------------------|
| <b>Identity Determinants and Folding/Assembly Core</b>           |             |                         |                                                                                                                |                                                                                                                  |
| A1                                                               | High        | AMP, ACP, AAP, AIP, AVP | $\alpha$ -defensin identity determinant; N-terminal residue distinguishing HNP-1 from HNP-2 and HNP-3          | HNP-1/2/3 differ only at the N-terminus; this position defines peptide identity and functional equivalence class |
| A11                                                              | High–Medium | AMP, ACP, AIP           | Structural anchor within the $\beta$ -sheet core; supports correct disulfide-bond geometry and oligomerization | $\alpha$ -defensin activity depends on intact $\beta$ -sheet architecture stabilized by disulfide bonds          |
| C29, C30                                                         | Medium      | ACP                     | Disulfide bond formation; maintenance of tertiary structure required for biological activity                   | Reduction or alkylation of cysteines disrupts antimicrobial, antiviral, and immunomodulatory functions           |
| G17                                                              | Medium–High | AVP                     | $\beta$ -bulge formation and peptide dimerization; contributes to self-association                             | Gly17 is conserved across $\alpha$ -defensins and implicated in dimerization and oligomeric assembly             |
| <b>Electrostatic Interaction Surface</b>                         |             |                         |                                                                                                                |                                                                                                                  |
| R14, R15                                                         | High–Medium | AMP, AVP, AIP           | Cationic surface mediating electrostatic interactions with anionic membranes and glycans                       | HNP-1 preferentially binds negatively charged microbial membranes and glycosylated surfaces                      |
| R5                                                               | Medium      | CPP                     | Initial electrostatic contact with cell membranes; contributes to cellular uptake                              | Non-specific cationic interactions underlie defensin membrane association                                        |
| E13                                                              | Medium      | AMP, CPP                | Salt-bridge formation with Arg5; enhances peptide stability in physiological environments                      | Arg5–Glu13 salt bridge increases resistance to proteolytic degradation without altering fold                     |
| <b>Hydrophobic Functional Execution Sites</b>                    |             |                         |                                                                                                                |                                                                                                                  |
| W26                                                              | High        | AAP                     | Hydrophobic aromatic hotspot; governs pathogen binding, dimerization, and functional versatility               | Trp26 is critical for microbial binding, oligomerization, and multiple biological activities                     |
| Y16                                                              | High–Medium | AMP, ACP                | Hydrophobic execution site involved in membrane interaction and cytotoxic activity                             | Tyr16 mutations demonstrate that side-chain hydrophobicity determines functional contribution                    |
| Y3                                                               | High        | ACP, AIP, AAP           | Aromatic surface residue contributing to protein–membrane and protein–protein interactions                     | Defensins destabilize pathogen proteins via exposure of hydrophobic patches                                      |
| F28                                                              | Medium–High | ACP                     | Hydrophobic core residue contributing to membrane disruption and cytotoxicity                                  | Phe28 mutagenesis supports hydrophobicity-dependent activity                                                     |
| L25                                                              | High        | AIP                     | Hydrophobic determinant involved in immune modulation and target interaction                                   | Leu25 mutations reduce functional activity, highlighting hydrophobic contribution                                |
| I20                                                              | Medium      | AHP, AIP                | Hydrophobic auxiliary residue influencing membrane-related interactions                                        | Ile20 identified as part of the hydrophobic functional cluster                                                   |
| I6, I10                                                          | Medium      | AVP, AIP                | Supporting hydrophobic residues contributing to viral or protein interactions                                  | Aliphatic side chains participate in target engagement                                                           |
| <b>Conformational Plasticity and Structural Adaptation Sites</b> |             |                         |                                                                                                                |                                                                                                                  |
| P7                                                               | High        | AAP, CPP, AHP           | Conformational turn-inducing residue; introduces local structural flexibility                                  | Proline residues modulate peptide geometry and functional adaptability                                           |
| G12, G23                                                         | Medium–High | ACP, AAP, CPP           | Flexible residues enabling surface adaptation and binding plasticity                                           | Glycine residues facilitate $\beta$ -bulges and conformational adjustments                                       |
| Q22                                                              | Medium      | AAP, CPP                | Neutral polar residue contributing to surface presentation and target recognition                              | Polar side chains modulate binding without dominating electrostatics                                             |
| A27, A8                                                          | Medium      | AAP, CPP                | Structural fine-tuning residues supporting local geometry                                                      | Small side chains accommodate compact $\beta$ -sheet packing                                                     |

<https://doi.org/10.1371/journal.pcbi.1014369.t002>

toolkits and internally developed scripts. This step generates a comprehensive feature profile, including basic sequence descriptors (e.g., peptide length and amino acid composition), core physicochemical properties (such as molecular weight, aromaticity, instability index, isoelectric point, extinction coefficients, GRAVY value, and flexibility), as well as 54 predefined amino acid–based scales derived from published studies. These multi-scale descriptors capture diverse

**Table 3. Detailed information of datasets collected from publications.**

| Bioactivity | Train Dataset |      | Test Dataset |      |
|-------------|---------------|------|--------------|------|
|             | pos           | neg  | pos          | neg  |
| AMP         | 8387          | 8387 | 1536         | 1536 |
| ACP         | 1176          | 1176 | 610          | 2760 |
| AAP         | 107           | 107  | 28           | 28   |
| AHP         | 856           | 856  | 214          | 363  |
| AIP         | 1258          | 1887 | 420          | 629  |
| AVP         | 2290          | 2311 | 417          | 395  |
| CPP         | 844           | 838  | 90           | 98   |

<https://doi.org/10.1371/journal.pcbi.1014369.t003>

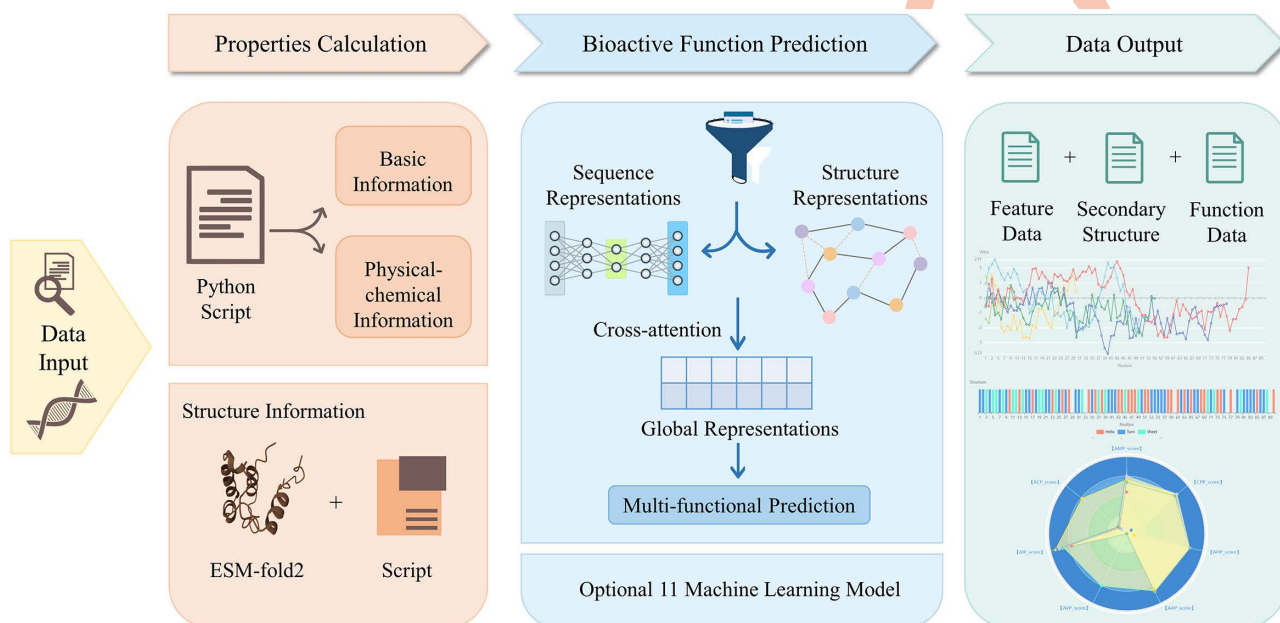

**Fig 5. Backend workflow of the PepAnno platform.** The process involves: (1) User data input (peptide sequences and parameters) followed by pre-processing. (2) Calculation of various peptide physicochemical features using toolkits. (3) Tertiary structure prediction of peptides. (4) Input of processed data into functional prediction model. (5) Final output of three main data files: comprehensive feature data, structural information, and integrated prediction results for all functions.

<https://doi.org/10.1371/journal.pcbi.1014369.g005>

chemical and biophysical characteristics of peptides and serve as essential inputs for downstream functional modeling and interpretation.

For structural analysis, PepAnno evaluates peptide secondary structure propensities by quantifying site-specific tendencies toward  $\alpha$ -helix,  $\beta$ -turn, and  $\beta$ -sheet formation based on established amino acid preference models. The resulting secondary structure scores are used to generate position-resolved visualizations, facilitating intuitive inspection of local structural tendencies. In addition, PepAnno utilized ESMFold [72] to predict tertiary structure of peptides. The predicted three-dimensional models are integrated into the analysis pipeline and rendered through an interactive visualization module, enabling users to explore global folding patterns and spatial residue arrangements.

The analytical core of PepAnno is built upon a unified prediction framework that integrates multiple functional prediction modules corresponding to different bioactivity categories. Sequence-based representations, physicochemical

features, and structural information are jointly utilized for feature extraction and classification within this framework. In addition to the proposed core model, the PepAnno platform also deploys a collection of 11 machine learning methods to support the prediction of seven bioactive peptide functions, providing complementary predictive perspectives (See Table K in S1 Appendix for details) [55,58–60,73–79]. The architecture and training strategy of the proposed core model are described in detail in the subsequent sections. For each functional category, the corresponding prediction module generates category-specific prediction scores, which are then systematically aggregated and organized within a unified analysis pipeline. The final results are presented through an integrated visualization interface, offering a comprehensive overview of predicted peptide functions across seven bioactivity categories and enabling efficient interpretation and comparative analysis of model outputs.

### Structure-aware multi-view deep learning framework

To achieve accurate identification and functional annotation of bioactive peptides across diverse categories, we propose a novel Structure-Aware Multi-view Geometric Deep Learning Framework (Fig 6). This framework synergistically integrates three core components: (1) a multi-view data representation module that constructs heterogeneous graphs from sequence and structural information; (2) a dual-stream neural architecture utilizing cross-modal attention for deep feature fusion; and (3) a strict hierarchical transfer learning strategy designed to ensure robust generalization on small-sample datasets.

**Data representation and heterogeneous graph construction.** To comprehensively capture the physicochemical and conformational characteristics of bioactive peptides, we represented each peptide sequence as both a sequential embedding and a geometric graph. For a peptide sequence of length  $L$ , we first predicted its three-dimensional (3D) structure using ESMFold2 and extracted the coordinates of  $C\alpha$  atoms. We constructed a heterogeneous biological graph  $\mathcal{G} = (\mathcal{V}, \mathcal{E})$  where nodes  $v$  represent amino acid residues. The node features  $X_{\text{node}} \in \mathbb{R}^{L \times 34}$  were composed of a 20-dimensional one-hot encoding of amino acid types concatenated with a 14-dimensional vector of physicochemical properties, including hydrophobicity, polarity, and van der Waals radius [58]. To model multi-scale interactions, the edge

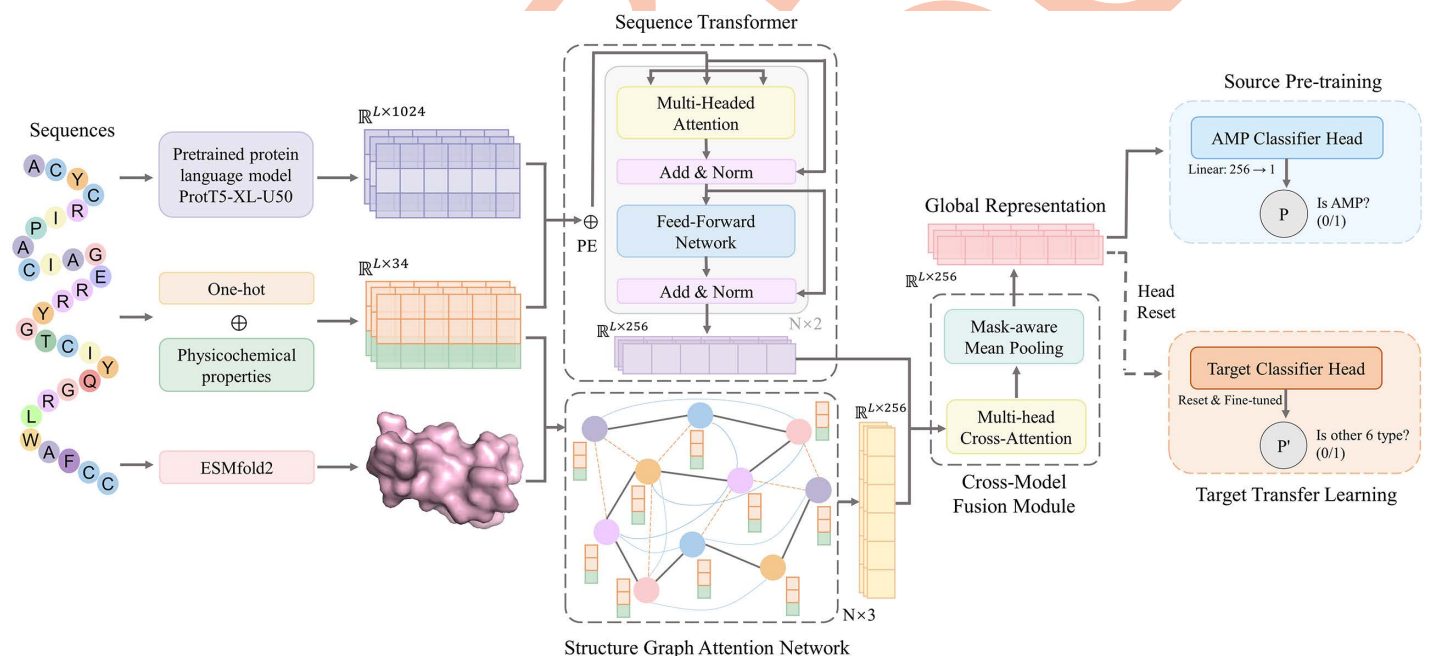

**Fig 6. The overall illustration of PepAnno’s structure-aware multi-view geometric deep learning framework.**

<https://doi.org/10.1371/journal.pcbi.1014369.g006>

set  $\mathcal{E}$  incorporated three distinct types of connections: primary edges connecting adjacent residues ( $i, i + 1$ ) to represent the peptide backbone; sequence window edges connecting residues within a local window ( $|i - j| \leq 2$ ) to capture local sequential context; and structural kNN edges connecting the  $k$ -nearest neighbors ( $k = 10$ ) based on Euclidean distances between  $C\alpha$  atoms to encode long-range spatial dependencies critical for protein folding. Each edge was further featurized using Radial Basis Function (RBF) distance encodings, relative direction vectors, and positional encodings. Additionally, to leverage evolutionary information, we utilized the pre-trained ProtT5-XL-U50 model to extract residue-level embeddings, which were concatenated with  $X_{\text{node}}$  to form a high-dimensional sequence representation  $X_{\text{seq}} \in \mathbb{R}^{L \times 1058}$ .

**Multi-view geometric deep learning architecture.** The proposed model employs a dual-stream architecture to process the structural and sequential views in parallel. The structure stream utilizes a 3-layer GATv2 (Graph Attention Network v2) to process the graph  $\mathcal{G}$  and node features  $X_{\text{node}}$ . By dynamically computing attention weights between neighboring residues, this stream updates node states to generate structural context tokens  $H_{\text{struct}} \in \mathbb{R}^{L \times 256}$ . Simultaneously, the sequence stream processes the high-dimensional representation  $X_{\text{seq}}$  using a 2-layer Transformer Encoder. A padding mask is applied to handle variable-length sequences, allowing the mechanism to capture long-range semantic dependencies and output sequence tokens  $H_{\text{seq}} \in \mathbb{R}^{L \times 256}$ .

Instead of employing a simple late-concatenation strategy that prematurely collapses the spatial dimensions into an opaque black-box vector, we deliberately introduced a Cross-Modal Fusion module based on the cross-attention mechanism to integrate these two modalities. Specifically, the sequence tokens  $H_{\text{seq}}$  serve as Queries, while the structural tokens  $H_{\text{struct}}$  serve as Keys and Values. This design allows the semantic features to dynamically query relevant spatial contexts, effectively injecting geometric information into the sequence representation. Crucially, this cross-attention mechanism explicitly computes an  $L \times L$  alignment matrix, thereby preserving the residue-level spatial resolution. Retaining this spatial dimension is fundamentally necessary for unlocking native 3D structural interpretability, enabling us to map predictive importance back to specific residues. The fused features are then aggregated via a mask-aware mean pooling layer into a global latent vector  $v \in \mathbb{R}^{256}$ , which serves as the input for the final classification head.

**Strict hierarchical transfer learning strategy.** Given the severe data imbalance between the abundant Antimicrobial Peptides (AMPs) and other functional categories with limited sample sizes (e.g., AAP, AIP), we implemented a strict hierarchical transfer learning strategy. In the first phase, designated as Source Domain Pre-training, the model backbone was trained on the balanced AMP dataset to learn generalized peptide feature representations. In the second phase, Target Domain Transfer, we utilized the pre-trained backbone weights to initialize models for specific target categories. Crucially, we employed a “Head Reset” strategy where the pre-trained linear classification head was discarded and re-initialized for each target task. This approach prevents negative transfer arising from the orthogonal decision boundaries of different functional classes. The model was then fine-tuned on the target datasets using the AdamW optimizer. Regarding the optimization objective, we employed advanced loss functions including Focal Loss and Poly Loss to address the imbalance between easy and hard samples. Specifically, Focal Loss was utilized to down-weight the contribution of well-classified examples and force the model to focus on “hard mining” of difficult samples near the decision boundary, while Poly Loss provided a flexible gradient adjustment framework based on Taylor expansion, enhancing generalization capabilities on small-scale datasets.

### Interpretability and visualization

To elucidate the biological basis of the model’s predictions, we analyzed the attention weights  $A \in \mathbb{R}^{L \times L}$  extracted from the cross-attention layer. We defined a Structure Importance Score for each residue by summing the attention weights received from all query tokens, representing the cumulative contribution of a specific structural region to the final prediction. To ensure robust visualization across different peptides, we applied percentile scaling to normalize these scores, clipping outliers to the 5th and 95th percentiles. These normalized scores were mapped to the B-factor field of the corresponding PDB files, allowing for the 3D visualization of high-attention regions. This method highlights functional motifs,

such as active sites or hydrophobic cores, as regions of high importance, providing residue-level interpretability for the identified bioactive peptides.

### Resource curation

To establish a comprehensive and reliable knowledge base for the peptide research community, we conducted a systematic literature survey across WOS and PubMed, specifically targeting the seven bioactive functional categories addressed in this study. The search strategy employed combinations of bioactivity-specific terms with keywords such as “prediction”, “computational tool”. To facilitate efficient resource discovery and navigation within the platform, we implemented a data-driven taxonomy strategy based on keyword frequency analysis. For each curated resource, we manually extracted key descriptions summarizing its core algorithms and functionalities. These textual descriptions underwent tokenization and normalization processing to quantify the frequency of functional descriptors across the entire corpus. Based on this analysis, the ten most prevalent terms were selected as high-priority filter tags in the “Resources” module.

Complementing the tool repository, we also curated datasets which are categorized by functional type and made available for download through a dedicated “Data” interface [55,56,58–60,73–80], providing a centralized resource for researchers to benchmark new models or conduct meta-analyses.

### Server construction and implementation

The PepAnno platform is built on a robust architecture to ensure efficient data processing and a seamless user experience. Both the front-end and back-end are developed using the Django framework, with the user interface designed based on Bootstrap 5. Advanced visualization is supported through ECharts [81] and Mol\* (MolStar) [82], enabling interactive and high-quality graphical representation. The platform is fully compatible with major web browsers, including Firefox, Google Chrome, and Microsoft Edge.

To ensure data security and user privacy, PepAnno adopts strict protection protocols. All communications between the client and server are encrypted via HTTPS. Submitted peptide sequences are used solely for the requested prediction tasks and are neither shared with third parties nor used for model retraining. Additionally, all uploaded data and generated results are stored temporarily and automatically deleted after 30 days, preventing long-term retention of sensitive information.

### Discussion and conclusion

In this study, we present PepAnno, a structure-aware and multi-functional peptide annotation platform designed to address both methodological and practical challenges in bioactive peptide analysis. Moving beyond conventional sequence-only predictors, PepAnno employs a dual-stream geometric deep learning architecture that synergizes pre-trained sequence semantics with 3D structural graphs via a cross-modal attention mechanism. To overcome the critical challenge of data scarcity and imbalance across different bioactivities, we implemented a strict hierarchical transfer learning strategy equipped with a “Head Reset” mechanism. Comprehensive benchmarking, rigorous ablation studies, and length-stratified evaluations demonstrate that PepAnno achieves highly robust and competitive performance, effectively avoiding negative transfer while maintaining strong out-of-distribution generalization. Crucially, rather than operating as an opaque black box, this architectural design unlocks native residue-level spatial interpretability, allowing researchers to visually pinpoint 3D functional motifs driving the bioactivity.

While our framework demonstrates robust generalization, it is important to delineate its applicability domain, particularly regarding sequence length. Architecturally, the dynamic nature of the graph and sequence attention mechanisms, combined with the mask-aware mean pooling layer, imposes no hard-coded limits on the input sequence length. However, the empirical predictive capability of the model is inherently bounded by the training data distribution. As illustrated in Fig D in [S1 Appendix](#), the sequence lengths in our training and independent test sets are predominantly concentrated between

5 and 100 amino acids. Consequently, applying the model to significantly longer sequences (e.g., full-length proteins exceeding this spectrum) may lead to sub-optimal results. This performance degradation primarily occurs because the signals of localized functional motifs can be severely diluted by the vast non-functional background during the global pooling stage. Therefore, PepAnno is optimally suited for identifying sequences within the typical length spectrum of bioactive peptides.

Beyond predictive accuracy, PepAnno places strong emphasis on usability, accessibility, and workflow integration. The platform enables one-click, end-to-end peptide analysis without requiring programming expertise, substantially lowering the barrier to entry for experimental and translational researchers. By unifying physicochemical characterization, structural prediction, functional annotation, and resource integration within a single interface, PepAnno alleviates the fragmented workflows commonly encountered in peptide research and facilitates systematic exploration of peptide properties prior to downstream experimental validation.

In addition, PepAnno incorporates a curated repository that systematically aggregates peptide-related databases, computational tools, and web resources. This centralized design not only provides a comprehensive entry point for peptide research but also supports comparative analysis and hypothesis generation by enabling users to contextualize functional predictions within existing knowledge. As such, PepAnno serves not only as a predictive tool but also as an integrative knowledge platform for bioactive peptide research.

To further enhance the capabilities and utility of PepAnno in assessing peptides with therapeutic potential, we are committed to the continuous updating and improvement of our web platform in the following aspects:

- (i) **Functional Expansion:** Firstly, we plan to integrate predictions for additional peptide functionalities within this web server. Secondly, we will incorporate target-related prediction capabilities in future updates, thereby providing resources for more detailed, mechanistic studies at a micro-level.
- (ii) **Performance Optimization:** Beyond utilizing existing original models and datasets, we will persistently collect new data and explore novel methodologies to construct models with enhanced performance.

## Supporting information

**S1 Appendix. Supplementary Materials.** This supporting document contains all supplementary tables and Figs cited in the main text. It includes the following sections: (a) Visualizations of PepAnno's web interface. (b) Training dynamics and cross-validation stability. (c) Length distribution of datasets. (d) Overall performance of PepAnno. (e) Comparisons of multi-functional platforms. (f) Comparisons for 7 bioactive functions. (g) Detailed information about optional methods of PepAnno. (h) Evaluation Metrics. (PDF)

## Acknowledgments

We thank all the members of Ming Chen's group for their valuable discussions. The authors have declared that no competing interests exist.

## Author contributions

**Conceptualization:** Enyan Liu, Yueming Hu, Julio Raúl Fernández Massó, Ming Chen.

**Data curation:** Enyan Liu.

**Formal analysis:** Enyan Liu, Yueming Hu.

**Funding acquisition:** Ming Chen.

**Investigation:** Enyan Liu, Yueming Hu.

**Methodology:** Enyan Liu, Yueming Hu.

**Project administration:** Enyan Liu, Ming Chen.

**Resources:** Ming Chen.

**Software:** Enyan Liu, Yueming Hu, Liya Liu.

**Supervision:** Ming Chen.

**Validation:** Enyan Liu, Ming Chen.

**Visualization:** Enyan Liu, Liya Liu, Yifan Chen, Shilong Zhang.

**Writing – original draft:** Enyan Liu, Yueming Hu, Yifan Chen, Shilong Zhang, Sida Li, Haoyu Chao, Luyao Xie, Yi Shen, Liangwei Wu, Ming Chen.

**Writing – review & editing:** Enyan Liu, Yueming Hu, Liya Liu, Yifan Chen, Shilong Zhang, Sida Li, Haoyu Chao, Luyao Xie, Yi Shen, Liangwei Wu, Julio Raúl Fernández Massó, Ming Chen.

## References

1. Akbarian M, Khani A, Eghbalpour S, Uversky VN. Bioactive peptides: synthesis, sources, applications, and proposed mechanisms of action. *Int J Mol Sci.* 2022;23.
2. Chiangjong W, Chutipongtanate S, Hongeng S. Anticancer peptide: physicochemical property, functional aspect and trend in clinical application (Review). *Int J Oncol.* 2020;57(3):678–96. <https://doi.org/10.3892/ijo.2020.5099> PMID: 32705178
3. Lazzaro BP, Zasloff M, Rolff J. Antimicrobial peptides: application informed by evolution. *Science.* 2020;368(6490):eaau5480. <https://doi.org/10.1126/science.aau5480> PMID: 32355003
4. Essa RZ, Wu Y-S, Batumalaie K, Sekar M, Poh C-L. Antiviral peptides against SARS-CoV-2: therapeutic targets, mechanistic antiviral activity, and efficient delivery. *Pharmacol Rep.* 2022;74(6):1166–81. <https://doi.org/10.1007/s43440-022-00432-6> PMID: 36401119
5. Gupta S, Sharma AK, Shastri V, Madhu MK, Sharma VK. Prediction of anti-inflammatory proteins/peptides: an insilico approach. *J Transl Med.* 2017;15(1):7. <https://doi.org/10.1186/s12967-016-1103-6> PMID: 28057002
6. Zasloff M. Antimicrobial peptides of multicellular organisms. *Nature.* 2002;415(6870):389–95. <https://doi.org/10.1038/415389a> PMID: 11807545
7. Ten Brummelhuis N, Wilke P, Börner HG. Identification of functional peptide sequences to lead the design of precision polymers. *Macromol Rapid Commun.* 2017;38(24):10.1002/marc.201700632. <https://doi.org/10.1002/marc.201700632> PMID: 29110359
8. Latham PW. Therapeutic peptides revisited. *Nat Biotechnol.* 1999;17(8):755–7. <https://doi.org/10.1038/11686> PMID: 10429238
9. Wetzler M, Hamilton P. Peptides as therapeutics. In: Koutsopoulos S, editor. *Peptide applications in biomedicine, biotechnology and bioengineering.* Woodhead Publishing; 2018. p. 215–30.
10. McGregor DP. Discovering and improving novel peptide therapeutics. *Curr Opin Pharmacol.* 2008;8(5):616–9. <https://doi.org/10.1016/j.coph.2008.06.002> PMID: 18602024
11. Fosgerau K, Hoffmann T. Peptide therapeutics: current status and future directions. *Drug Discov Today.* 2015;20(1):122–8. <https://doi.org/10.1016/j.drudis.2014.10.003> PMID: 25450771
12. Purohit K, Reddy N, Sunna A. Exploring the potential of bioactive peptides: from natural sources to therapeutics. *Int J Mol Sci.* 2024;25(3):1391. <https://doi.org/10.3390/ijms25031391> PMID: 38338676
13. Fernández-Díaz R, Cossio-Pérez R, Agoni C, Lam HT, Lopez V, Shields DC. AutoPeptideML: a study on how to build more trustworthy peptide bioactivity predictors. *Bioinformatics.* 2024;40(9):btac555. <https://doi.org/10.1093/bioinformatics/btac555> PMID: 39292535
14. Xu J, Li F, Li C, Guo X, Landersdorfer C, Shen H-H, et al. iAMPcN: a deep-learning approach for identifying antimicrobial peptides and their functional activities. *Brief Bioinform.* 2023;24(4):bbad240. <https://doi.org/10.1093/bib/bbad240> PMID: 37369638
15. Du Z, Ding X, Xu Y, Li Y. UniDL4BioPep: a universal deep learning architecture for binary classification in peptide bioactivity. *Brief Bioinform.* 2023;24(3):bbad135. <https://doi.org/10.1093/bib/bbad135> PMID: 37020337
16. Wu G, Zheng R, Tian Y, Liu D. Joint Ranking SVM and Binary Relevance with robust Low-rank learning for multi-label classification. *Neural Netw.* 2020;122:24–39. <https://doi.org/10.1016/j.neunet.2019.10.002> PMID: 31675625
17. Zou Z, Tian S, Gao X, Li Y. mDEEPre: multi-functional enzyme function prediction with hierarchical multi-label deep learning. *Front Genet.* 2019;9:714. <https://doi.org/10.3389/fgene.2018.00714> PMID: 30723495
18. Wu G, Tian Y, Liu D. Cost-sensitive multi-label learning with positive and negative label pairwise correlations. *Neural Netw.* 2018;108:411–23. <https://doi.org/10.1016/j.neunet.2018.09.003> PMID: 30312958

19. Shi H, Zhang S. Accurate prediction of anti-hypertensive peptides based on convolutional neural network and gated recurrent unit. *Interdiscip Sci*. 2022;14(4):879–94. <https://doi.org/10.1007/s12539-022-00521-3> PMID: 35474167
20. Ahmed S, Muhammod R, Khan ZH, Adilina S, Sharma A, Shatabda S, et al. ACP-MHCNN: an accurate multi-headed deep-convolutional neural network to predict anticancer peptides. *Sci Rep*. 2021;11(1):23676. <https://doi.org/10.1038/s41598-021-02703-3> PMID: 34880291
21. Schaduangrat N, Nantasenamat C, Prachayasittikul V, Shoombuatong W. ACPred: a computational tool for the prediction and analysis of anticancer peptides, molecules. 2019;24.
22. Han B, Zhao N, Zeng C, Mu Z, Gong X. ACPred-BMF: bidirectional LSTM with multiple feature representations for explainable anticancer peptide prediction. *Sci Rep*. 2022;12(1):21915. <https://doi.org/10.1038/s41598-022-24404-1> PMID: 36535969
23. Dong GF, Zheng L, Huang SH, Gao J, Zuo YC. Amino acid reduction can help to improve the identification of antimicrobial peptides and their functional activities. *Frontiers in Genetics*. 2021;12.
24. Bhadra P, Yan J, Li J, Fong S, Siu SWI. AmPEP: sequence-based prediction of antimicrobial peptides using distribution patterns of amino acid properties and random forest. *Sci Rep*. 2018;8(1):1697. <https://doi.org/10.1038/s41598-018-19752-w> PMID: 29374199
25. Fingerhut LCHW, Miller DJ, Strugnelli JM, Daly NL, Cooke IR. ampir: an R package for fast genome-wide prediction of antimicrobial peptides. *Bioinformatics*. 2021;36(21):5262–3. <https://doi.org/10.1093/bioinformatics/btaa653> PMID: 32683445
26. Agrawal P, Bhagat D, Mahalwal M, Sharma N, Raghava GPS. AntiCP 2.0: an updated model for predicting anticancer peptides. *Briefings in Bioinformatics*. 2021;22.
27. Pang Y, Yao L, Jhong J-H, Wang Z, Lee T-Y. AVPIden: a new scheme for identification and functional prediction of antiviral peptides based on machine learning approaches. *Brief Bioinform*. 2021;22(6):bbab263. <https://doi.org/10.1093/bib/bbab263> PMID: 34279599
28. Waghu FH, Barai RS, Gurung P, Idicula-Thomas S. CAMPR3: a database on sequences, structures and signatures of antimicrobial peptides. *Nucleic Acids Res*. 2016;44(D1):D1094-7. <https://doi.org/10.1093/nar/gkv1051> PMID: 26467475
29. Burdukiewicz M, Sidorczuk K, Rafacz D, Pietluch F, Bakała M, Słowik J, et al. CancerGram: an effective classifier for differentiating anticancer from antimicrobial peptides. *Pharmaceutics*. 2020;12(11):1045. <https://doi.org/10.3390/pharmaceutics12111045> PMID: 33142753
30. Chung C-R, Kuo T-R, Wu L-C, Lee T-Y, Horng J-T. Characterization and identification of antimicrobial peptides with different functional activities. *Brief Bioinform*. 2019;bbz043. <https://doi.org/10.1093/bib/bbz043> PMID: 31155657
31. Zhuang YY, Liu XR, Zhong Y, Wu LX. A deep ensemble predictor for identifying anti-hypertensive peptides using pretrained protein embedding, *IEEE-ACM trans comput biol bioinform*. 2022;19:1986–92.
32. Veltri D, Kamath U, Shehu A. Deep learning improves antimicrobial peptide recognition. *Bioinformatics*. 2018;34(16):2740–7. <https://doi.org/10.1093/bioinformatics/bty179> PMID: 29590297
33. Yan J, Bhadra P, Li A, Sethiya P, Qin L, Tai HK, et al. Deep-AmPEP30: improve short antimicrobial peptides prediction with deep learning. *Mol Ther Nucleic Acids*. 2020;20:882–94. <https://doi.org/10.1016/j.omtn.2020.05.006> PMID: 32464552
34. Li J, Pu Y, Tang J, Zou Q, Guo F. DeepAVP: a dual-channel deep neural network for identifying variable-length antiviral peptides. *IEEE J Biomed Health Inform*. 2020;24(10):3012–9. <https://doi.org/10.1109/JBHI.2020.2977091> PMID: 32142462
35. Timmons PB, Hewage CM. ENNAVIA is a novel method which employs neural networks for antiviral and anti-coronavirus activity prediction for therapeutic peptides. *Brief Bioinform*. 2021;22(6):bbab258. <https://doi.org/10.1093/bib/bbab258> PMID: 34297817
36. Kurata H, Tsukiyama S, Manavalan B. iACVP: markedly enhanced identification of anti-coronavirus peptides using a dataset-specific word2vec model. *Brief Bioinform*. 2022;23(4):bbac265. <https://doi.org/10.1093/bib/bbac265> PMID: 35772910
37. Xiao X, Shao Y-T, Cheng X, Stamatovic B. iAMP-CA2L: a new CNN-BiLSTM-SVM classifier based on cellular automata image for identifying antimicrobial peptides and their functional types. *Brief Bioinform*. 2021;22(6):bbab209. <https://doi.org/10.1093/bib/bbab209> PMID: 34086856
38. Huang K-Y, Tseng Y-J, Kao H-J, Chen C-H, Yang H-H, Weng S-L. Identification of subtypes of anticancer peptides based on sequential features and physicochemical properties. *Sci Rep*. 2021;11(1):13594. <https://doi.org/10.1038/s41598-021-93124-9> PMID: 34193950
39. Gautam A, Chaudhary K, Kumar R, Sharma A, Kapoor P, Tyagi A, et al. In silico approaches for designing highly effective cell penetrating peptides. *J Transl Med*. 2013;11:74. <https://doi.org/10.1186/1479-5876-11-74> PMID: 23517638
40. Kumar R, Chaudhary K, Singh Chauhan J, Nagpal G, Kumar R, Sharma M, et al. An in silico platform for predicting, screening and designing of antihypertensive peptides. *Sci Rep*. 2015;5:12512. <https://doi.org/10.1038/srep12512> PMID: 26213115
41. Lee H-T, Lee C-C, Yang J-R, Lai JZC, Chang KY. A large-scale structural classification of antimicrobial peptides. *Biomed Res Int*. 2015;2015:475062. <https://doi.org/10.1155/2015/475062> PMID: 26000295
42. Schaduangrat N, Nantasenamat C, Prachayasittikul V, Shoombuatong W. Meta-iAVP: a sequence-based meta-predictor for improving the prediction of antiviral peptides using effective feature representation. *Int J Mol Sci*. 2019;20(22):5743. <https://doi.org/10.3390/ijms20225743> PMID: 31731751
43. Manavalan B, Patra MC. MLCPP 2.0: an updated cell-penetrating peptides and their uptake efficiency predictor. *J Mol Biol*. 2022;434(11):167604. <https://doi.org/10.1016/j.jmb.2022.167604> PMID: 35662468
44. Liao W, Yan SY, Cao XY, Xia H, Wang SK, Sun GJ. A novel LSTM-based machine learning model for predicting the activity of food protein-derived antihypertensive peptides. *Molecules*. 2023;28.

45. Zhang YP, Zou Q. PPTPP: a novel therapeutic peptide prediction method using physicochemical property encoding and adaptive feature representation learning. *Bioinformatics*. 2020;36:3982–7.
46. Guan J, Yao L, Chung C-R, Xie P, Zhang Y, Deng J, et al. Predicting anti-inflammatory peptides by ensemble machine learning and deep learning. *J Chem Inf Model*. 2023;63(24):7886–98. <https://doi.org/10.1021/acs.jcim.3c01602> PMID: 38054927
47. Deng H, Lou C, Wu Z, Li W, Liu G, Tang Y. Prediction of anti-inflammatory peptides by a sequence-based stacking ensemble model named AIP-Stack. *iScience*. 2022;25(9):104967. <https://doi.org/10.1016/j.isci.2022.104967> PMID: 36093066
48. Tang H, Su Z-D, Wei H-H, Chen W, Lin H. Prediction of cell-penetrating peptides with feature selection techniques. *Biochem Biophys Res Commun*. 2016;477(1):150–4. <https://doi.org/10.1016/j.bbrc.2016.06.035> PMID: 27291150
49. Kumar V, Agrawal P, Kumar R, Bhalla S, Usmani SS, Varshney GC. Prediction of cell-penetrating potential of modified peptides containing natural and chemically modified residues. *Frontiers in Microbiology*. 2018;9.
50. Yan K, Guo Y, Liu B. PreTP-2L: identification of therapeutic peptides and their types using two-layer ensemble learning framework. *Bioinformatics*. 2023;39(4):btad125. <https://doi.org/10.1093/bioinformatics/btad125> PMID: 37010503
51. Yan K, Lv HW, Wen J, Guo YC, Xu Y, Liu B. PreTP-Stack: prediction of therapeutic peptides based on the stacked ensemble learning. *IEEE-ACM Transactions on Computational Biology and Bioinformatics*. 2023;20:1337–44.
52. Burdukiewicz M, Sidorczuk K, Rafacz D, Pietluch F, Chilimoniuk J, Rödiger S, et al. Proteomic screening for prediction and design of antimicrobial peptides with AmpGram. *Int J Mol Sci*. 2020;21(12):4310. <https://doi.org/10.3390/ijms21124310> PMID: 32560350
53. Singh V, Singh SK. A separable temporal convolutional networks based deep learning technique for discovering antiviral medicines. *Sci Rep*. 2023;13(1):13722. <https://doi.org/10.1038/s41598-023-40922-y> PMID: 37608092
54. Zhou W, Liu Y, Li Y, Kong S, Wang W, Ding B, et al. TriNet: A tri-fusion neural network for the prediction of anticancer and antimicrobial peptides. *Patterns (N Y)*. 2023;4(3):100702. <https://doi.org/10.1016/j.patter.2023.100702> PMID: 36960450
55. Lawrence TJ, Carper DL, Spangler MK, Carrell AA, Rush TA, Minter SJ. amPEPpy 1.0: a portable and accurate antimicrobial peptide prediction tool. *Bioinformatics*. 2021;37:2058–60.
56. Yan K, Lv H, Guo Y, Peng W, Liu B. sAMPpred-GAT: prediction of antimicrobial peptide by graph attention network and predicted peptide structure. *Bioinformatics*. 2023;39(1):btac715. <https://doi.org/10.1093/bioinformatics/btac715> PMID: 36342186
57. Sangaraju VK, Pham NT, Wei L, Yu X, Manavalan B. mACPPred 2.0: stacked deep learning for anticancer peptide prediction with integrated spatial and probabilistic feature representations. *J Mol Biol*. 2024;436(17):168687. <https://doi.org/10.1016/j.jmb.2024.168687> PMID: 39237191
58. Han J, Kong T, Liu J. PepNet: an interpretable neural network for anti-inflammatory and antimicrobial peptides prediction using a pre-trained protein language model. *Commun Biol*. 2024;7(1):1198. <https://doi.org/10.1038/s42003-024-06911-1> PMID: 39341947
59. Du Z, Ding X, Hsu W, Munir A, Xu Y, Li Y. pLM4ACE: a protein language model based predictor for antihypertensive peptide screening. *Food Chem*. 2024;431:137162. <https://doi.org/10.1016/j.foodchem.2023.137162> PMID: 37604011
60. Zahirji J, Khorsand B, Yousefi AA, Kargar M, Shirali Hossein Zade R, Mahdevar G. AntAngioCOOL: computational detection of anti-angiogenic peptides. *J Transl Med*. 2019;17(1):71. <https://doi.org/10.1186/s12967-019-1813-7> PMID: 30832671
61. Janeway C, Travers P, Walport M, Shlomchik MJ. *Immunobiology: the immune system in health and disease*. New York, NY, USA: Garland Pub; 2001.
62. Lehrer RI, Lu W.  $\alpha$ -Defensins in human innate immunity. *Immunol Rev*. 2012;245(1):84–112. <https://doi.org/10.1111/j.1600-065X.2011.01082.x> PMID: 22168415
63. Ghaly G, Tallima H, Dabbish E, ElDin NB, Abd El-Rahman MK, Ibrahim MAA. Anti-cancer peptides: status and future prospects. *Molecules*. 2023;28.
64. Zhang J, Liu Z, Zhou Z, Huang Z, Yang Y, Wu J, et al. HNP-1: from structure to application thanks to multifaceted functions. *Microorganisms*. 2025;13(2):458. <https://doi.org/10.3390/microorganisms13020458> PMID: 40005828
65. Wang J, Feng J, Kang Y, Pan P, Ge J, Wang Y, et al. Discovery of antimicrobial peptides with notable antibacterial potency by an LLM-based foundation model. *Sci Adv*. 2025;11(10):eads8932. <https://doi.org/10.1126/sciadv.ads8932> PMID: 40043127
66. Xu J, Li F, Leier A, Xiang D, Shen H-H, Marquez Lago TT, et al. Comprehensive assessment of machine learning-based methods for predicting antimicrobial peptides. *Brief Bioinform*. 2021;22(5):bbab083. <https://doi.org/10.1093/bib/bbab083> PMID: 33774670
67. Charoenkwan P, Chumnanpuen P, Schaduangrat N, Shoombuatong W. Stack-AVP: a stacked ensemble predictor based on multi-view information for fast and accurate discovery of antiviral peptides. *J Mol Biol*. 2025;437(6):168853. <https://doi.org/10.1016/j.jmb.2024.168853> PMID: 39510347
68. Yang S, Ni J, Xu P. AI4ACEIP: a computing tool to identify food peptides with high inhibitory activity for ace by merged molecular representation and rich intrinsic sequence information based on an ensemble learning strategy. *J Agric Food Chem*. 2024;72(45):25340–56. <https://doi.org/10.1021/acs.jafc.4c05650> PMID: 39495772
69. Ettayapuram Ramaprasad AS, Singh S, Gajendra P S R, Venkatesan S. AntiAngioPred: a server for prediction of anti-angiogenic peptides. *PLoS One*. 2015;10(9):e0136990. <https://doi.org/10.1371/journal.pone.0136990> PMID: 26335203
70. Imre A, Balogh B, Mándity I. GraphCPP: the new state-of-the-art method for cell-penetrating peptide prediction via graph neural networks. *Br J Pharmacol*. 2025;182(3):495–509. <https://doi.org/10.1111/bph.17388> PMID: 39568115

71. Li W, Godzik A. Cd-hit: a fast program for clustering and comparing large sets of protein or nucleotide sequences. *Bioinformatics*. 2006;22(13):1658–9. <https://doi.org/10.1093/bioinformatics/btl158> PMID: [16731699](https://pubmed.ncbi.nlm.nih.gov/16731699/)
72. Lin Z, Akin H, Rao R, Hie B, Zhu Z, Lu W, et al. Evolutionary-scale prediction of atomic-level protein structure with a language model. *Science*. 2023;379(6637):1123–30. <https://doi.org/10.1126/science.ade2574> PMID: [36927031](https://pubmed.ncbi.nlm.nih.gov/36927031/)
73. Wang R, Wang T, Zhuo L, Wei J, Fu X, Zou Q, et al. Diff-AMP: tailored designed antimicrobial peptide framework with all-in-one generation, identification, prediction and optimization. *Brief Bioinform*. 2024;25(2):bbae078. <https://doi.org/10.1093/bib/bbae078> PMID: [38446739](https://pubmed.ncbi.nlm.nih.gov/38446739/)
74. Yuan Q, Chen K, Yu Y, Le NQK, Chua MCH. Prediction of anticancer peptides based on an ensemble model of deep learning and machine learning using ordinal positional encoding. *Brief Bioinform*. 2023;24(1):bbac630. <https://doi.org/10.1093/bib/bbac630> PMID: [36642410](https://pubmed.ncbi.nlm.nih.gov/36642410/)
75. Lee B, Shin D. Contrastive learning for enhancing feature extraction in anticancer peptides. *Brief Bioinform*. 2024;25(3):bbae220. <https://doi.org/10.1093/bib/bbae220> PMID: [38725157](https://pubmed.ncbi.nlm.nih.gov/38725157/)
76. Lin D, Yu J, Zhang J, He H, Guo X, Shi S. PREDAIIP: computational prediction and analysis for anti-inflammatory peptide via a hybrid feature selection technique. *CBIO*. 2021;16(8):1048–59. <https://doi.org/10.2174/1574893616666210601111157>
77. Xu Y, Liu TY, Yang Y, Kang JJ, Ren LP, Ding H. ACVPred: enhanced prediction of anti-coronavirus peptides by transfer learning combined with data augmentation. *Future Generation Computer Systems*. 2024;160:305–15.
78. Cao R, Hu W, Wei P, Ding Y, Bin Y, Zheng C. FFMAVP: a new classifier based on feature fusion and multitask learning for identifying antiviral peptides and their subclasses. *Brief Bioinform*. 2023;24(6):bbad353. <https://doi.org/10.1093/bib/bbad353> PMID: [37861174](https://pubmed.ncbi.nlm.nih.gov/37861174/)
79. Zhang X, Wei L, Ye X, Zhang K, Teng S, Li Z, et al. SiameseCPP: a sequence-based Siamese network to predict cell-penetrating peptides by contrastive learning. *Brief Bioinform*. 2023;24(1):bbac545. <https://doi.org/10.1093/bib/bbac545> PMID: [36562719](https://pubmed.ncbi.nlm.nih.gov/36562719/)
80. He W, Jiang Y, Jin J, Li Z, Zhao J, Manavalan B, et al. Accelerating bioactive peptide discovery via mutual information-based meta-learning. *Brief Bioinform*. 2022;23(1):bbab499. <https://doi.org/10.1093/bib/bbab499> PMID: [34882225](https://pubmed.ncbi.nlm.nih.gov/34882225/)
81. Li D, Mei H, Shen Y, Su S, Zhang W, Wang J, et al. ECharts: a declarative framework for rapid construction of web-based visualization. *Visual Informatics*. 2018;2(2):136–46. <https://doi.org/10.1016/j.visinf.2018.04.011>
82. Sehnal D, Bittrich S, Deshpande M, Svobodová R, Berka K, Bazgier V, et al. Mol\* viewer: modern web app for 3D visualization and analysis of large biomolecular structures. *Nucleic Acids Res*. 2021;49(W1):W431–7. <https://doi.org/10.1093/nar/gkab314> PMID: [33956157](https://pubmed.ncbi.nlm.nih.gov/33956157/)
